# Supplementary material
Source: PubMed Central journal article supplement (PMC2689978)
Supplement: pp.109.137828_1.pdf [file pp.109.137828_1.pdf]

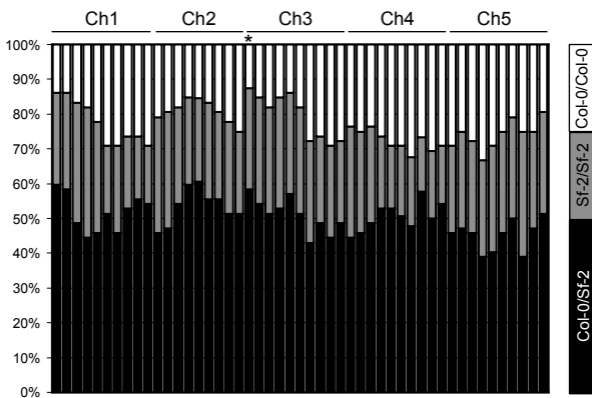

Supplemental Figure 1. Genotype segregation of Sf-2 x Col-0 F2 progeny at each marker position. The fit to the expected F2 segregation ratio (1:2:1) was analyzed using a G-test (\*:  $0.01 < P < 0.05$ ). The column to the right of the bar graph represents the expected segregation, 50% of heterozygote and 25% of each homozygote.
