# Supplementary material
Source: PubMed Central journal article supplement (PMC2689978)
Supplement: pp.109.137828_2.pdf [file pp.109.137828_2.pdf]

## Supplemental Table S1.xls

Supplemental Table S1. List of NPQ values in Arabidopsis accessions

| #  | Accession     | NPQ <sup>a</sup> |
|----|---------------|------------------|
| 1  | LI-1          | 3.214            |
| 2  | Sf-2          | 3.160            |
| 3  | Ts-1          | 3.133            |
| 4  | Van-0         | 3.125            |
| 5  | Mz-0          | 3.073            |
| 6  | Mr-0          | 3.048            |
| 7  | Kin-0         | 3.000            |
| 8  | Br-0          | 2.994            |
| 9  | LI-0          | 2.986            |
| 10 | Wen-0         | 2.974            |
| 11 | Ts-5          | 2.920            |
| 12 | Nd            | 2.887            |
| 13 | Gr-3          | 2.859            |
| 14 | Est           | 2.810            |
| 15 | Gy-0          | 2.797            |
| 16 | Mh-0          | 2.780            |
| 17 | Gre-0         | 2.771            |
| 18 | Yo-0          | 2.739            |
| 19 | WAR           | 2.729            |
| 20 | Ga-0          | 2.702            |
| 21 | Kondara       | 2.700            |
| 22 | Mt-0          | 2.685            |
| 23 | Je-0          | 2.676            |
| 24 | Db-0          | 2.674            |
| 25 | KEN           | 2.674            |
| 26 | Ag-0          | 2.648            |
| 27 | RLD           | 2.644            |
| 28 | Wt-5          | 2.644            |
| 29 | Bay-0         | 2.643            |
| 30 | Gö-0          | 2.642            |
| 31 | Bu-22         | 2.638            |
| 32 | Pi-0          | 2.637            |
| 33 | Kas-1         | 2.633            |
| 34 | Ei-4          | 2.616            |
| 35 | Nok-3         | 2.606            |
| 36 | En            | 2.598            |
| 37 | Est-1         | 2.596            |
| 38 | Tul-0         | 2.585            |
| 39 | Ms-0          | 2.581            |
| 40 | No-0          | 2.577            |
| 41 | S96           | 2.569            |
| 42 | Lu-1          | 2.566            |
| 43 | Do-0          | 2.565            |
| 44 | For-2         | 2.542            |
| 45 | Di-G          | 2.538            |
| 46 | Pf-0          | 2.526            |
| 47 | Col-4         | 2.517            |
| 48 | ENF           | 2.514            |
| 49 | Berkeley      | 2.493            |
| 50 | Sorbo         | 2.491            |
| 51 | Cvi-0         | 2.479            |
| 52 | Col-0         | 2.479            |
| 53 | Buckhorn Pass | 2.476            |
| 54 | C24           | 2.473            |
| 55 | Sei-0         | 2.466            |
| 56 | Ct-1          | 2.459            |
| 57 | Ws-2          | 2.436            |
| 58 | Sha           | 2.436            |
| 59 | Aua/Rhön      | 2.427            |
| 60 | Tsu-1         | 2.420            |
| 61 | Ron-0         | 2.390            |
| 62 | Ler-1         | 2.352            |

<sup>a</sup> NPQ values measured after 10 min in actinic illumination with 1500  $\mu\text{mol photons m}^{-2} \text{s}^{-1}$
