# Supplementary material
Source: PubMed Central journal article supplement (PMC2689978)
Supplement: pp.109.137828_3.pdf [file pp.109.137828_3.pdf]

Supplemental Table S2. List of markers, positions, types and PCR conditions

| Marker     | Position |                 | Type   | PCR              |                  | enzyme <sup>d</sup> | Gel % |
|------------|----------|-----------------|--------|------------------|------------------|---------------------|-------|
|            | Ch       | cM <sup>a</sup> |        | Tem <sup>b</sup> | Ext <sup>c</sup> |                     |       |
| NGA59      | 1        | 0.0             | SSLP   |                  |                  |                     |       |
| NGA63      | 1        | 17.1            | SSLP   |                  |                  |                     |       |
| SNP397C    | 1        | 29.6            | CAPS   | 58               | 1.0              | HpyCh4 IV           | 1.6   |
| NF19G9     | 1        | 38.2            | SSLP   |                  |                  |                     |       |
| SO392      | 1        | 46.8            | SSLP   |                  |                  |                     |       |
| A44575     | 1        | 78.7            | CAPS   | 59               | 1.0              | Hinfl               | 1.6   |
| CIW1       | 1        | 90.1            | SSLP   |                  |                  |                     |       |
| NGA280     | 1        | 97.0            | SSLP   |                  |                  |                     |       |
| N5F14      | 1        | 104.8           | SSLP   |                  |                  |                     |       |
| NGA111     | 1        | 124.1           | SSLP   |                  |                  |                     |       |
| RGA        | 2        | 0.0             | CAPS   | 55               | 0.5              | Rsal                | 3.0   |
| NGA1145    | 2        | 5.2             | SSLP   |                  |                  |                     |       |
| SNP299C    | 2        | 22.0            | CAPS   | 58               | 1.0              | Ddel                | 2.0   |
| CIW3       | 2        | 29.8            | SSLP   |                  |                  |                     |       |
| T20D161    | 2        | 53.3            | CAPS   | 55               | 2.0              | PstI                | 1.2   |
| ER         | 2        | 58.7            | CAPS   | 60               | 0.5              | Ddel                | 1.6   |
| C4H        | 2        | 68.3            | SSLP   |                  |                  |                     |       |
| NGA168     | 2        | 77.0            | SSLP   |                  |                  |                     |       |
| GBF3       | 2        | 92.6            | CAPS   | 58               | 1.5              | HindIII             | 1.2   |
| C6         | 3        | 0.0             | CAPS   | 50               | 1.0              | Ddel                | 1.6   |
| NGA126     | 3        | 2.2             | SSLP   |                  |                  |                     |       |
| NGA162     | 3        | 5.1             | SSLP   |                  |                  |                     |       |
| ARLIM15.2  | 3        | 15.6            | CAPS   | 55               | 1.0              | Rsal                | 1.6   |
| CIW11      | 3        | 24.3            | SSLP   |                  |                  |                     |       |
| C42050     | 3        | 40.0            | IN/DEL | 60               | 0.5              |                     | 3.0   |
| ALS        | 3        | 57.6            | CAPS   | 55               | 1.5              | HaeIII              | 1.6   |
| F24M12-TGF | 3        | 65.4            | SSLP   |                  |                  |                     |       |
| Pur5       | 3        | 70.6            | CAPS   | 60               | 1.0              | Rsal                | 1.6   |
| NGA112     | 3        | 79.2            | SSLP   |                  |                  |                     |       |
| D01650     | 4        | 0.0             | IN/DEL | 59               | 1.0              |                     | 1.2   |
| T5L23.3    | 4        | 3.7             | CAPS   | 58               | 1.0              | MspI                | 1.2   |
| NGA8       | 4        | 11.5            | SSLP   |                  |                  |                     |       |
| D12320     | 4        | 28.2            | CAPS   | 59               | 0.5              | Ddel                | 3.0   |
| SC5        | 4        | 36.0            | CAPS   | 50               | 0.5              | AccI                | 1.6   |
| AG         | 4        | 38.9            | CAPS   | 50               | 1.5              | XbaI                | 1.2   |
| FIZ4       | 4        | 44.3            | CAPS   | 54               | 2.0              | MspI                | 1.2   |
| NGA1139    | 4        | 59.1            | SSLP   |                  |                  |                     |       |
| JM411      | 4        | 63.6            | CAPS   | 55               | 1.5              | Ddel                | 3.0   |
| DHS1       | 4        | 67.3            | SSLP   |                  |                  |                     |       |
| CTR1       | 5        | 0.0             | SSLP   |                  |                  |                     |       |
| NGA158     | 5        | 6.9             | SSLP   |                  |                  |                     |       |
| NGA106     | 5        | 15.5            | SSLP   |                  |                  |                     |       |
| CIW8       | 5        | 24.1            | SSLP   |                  |                  |                     |       |
| NGA139     | 5        | 29.3            | SSLP   |                  |                  |                     |       |
| SO262      | 5        | 40.6            | SSLP   |                  |                  |                     |       |
| PHYC       | 5        | 53.0            | SSLP   |                  |                  |                     |       |
| CIW9       | 5        | 75.2            | SSLP   |                  |                  |                     |       |
| NGA129     | 5        | 84.7            | SSLP   |                  |                  |                     |       |
| MBK-5      | 5        | 109.4           | SSLP   |                  |                  |                     |       |

<sup>a</sup> Position is distance from the first marker on each chromosome.

<sup>b</sup> Annealing temperature in °C

<sup>c</sup> Extension time in min

<sup>d</sup> Polymorphic restriction enzyme for CAPS markers
